# Supplementary material
Source: Springer Nature journal article supplement (https://www.springermedizin.de/resource/supplementary/13054_2007_5545_MOESM4_ESM.pdf/9725452)

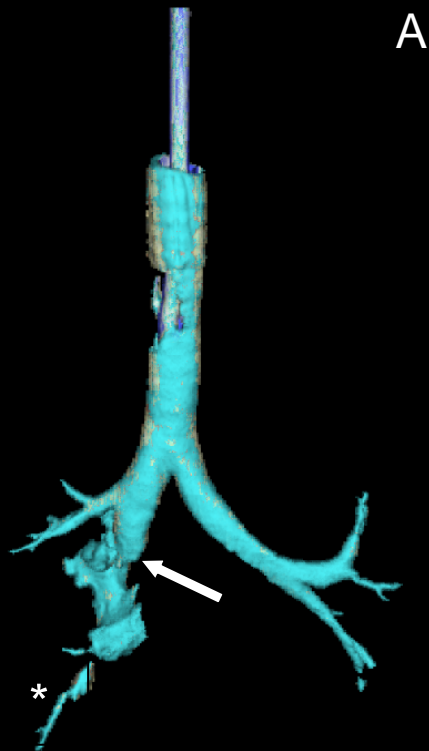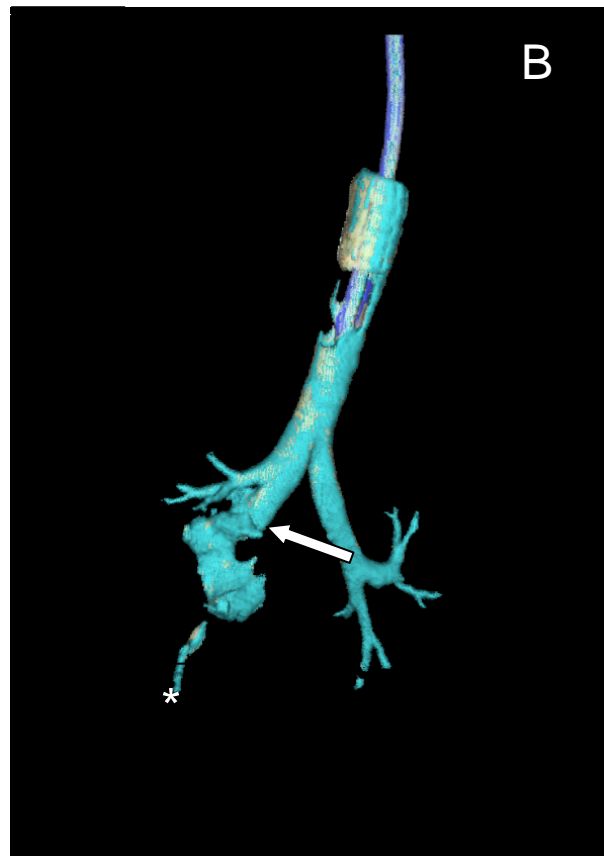

Supplement: MOESM4 [file 9725452]
